# Supplementary material
Source: publisher figshare collection journal article supplement (https://karger.figshare.com/ndownloader/files/21355920)
Supplement: Supplementary file 1 [file 21355920]

**Figure legends**

**Supplementary material 1. (a)** The patient underwent distal pancreatectomy for pancreatic body cancer. The pancreas was transected along the left margin of the superior mesenteric vein. The thickness of the transected pancreas measured on preoperative computed tomography was 11 mm. **(b)** The patient underwent spleen-preserving distal pancreatectomy for neuroendocrine tumor. The resection site of the pancreas was 3 cm proximal from the tumor. The thickness was 17 mm on preoperative computed tomography.
